# Supplementary material for: Technical Note: Real-Time Diagnosis of the Hygroscopic Growth Micro-Dynamics of Nanoparticles with Two-Dimensional Correlation Infrared Spectroscopy
Source: Copernicus journal article supplement (doi:10.5194/acp-2021-763), 2021-11-15
Supplement: Supplementary file 1 [file acp-2021-763-supplement-version2.pdf]

*Supplement of*

## **Real-time diagnosis of the hygroscopic growth micro-dynamics of nanoparticles with Fourier transform infrared spectroscopy**

Xiuli Wei<sup>1,2</sup>, Haosheng Dai<sup>1,2</sup>, Huaqiao Gui<sup>1,3\*</sup>, Jiaoshi Zhang<sup>1</sup>, Yin Cheng<sup>1,2</sup>, Jie Wang<sup>1</sup>, Yixin Yang<sup>1</sup>, Youwen Sun<sup>1\*</sup>, and Jianguo Liu<sup>1,2,3</sup>

1 Key Laboratory of Environmental Optics and Technology, Anhui Institute of Optics and Fine Mechanics, Hefei Institutes of Physical Science, Chinese Academy of Sciences, Hefei 230031, China

2 University of Science and Technology of China, Hefei 230031, China

3 CAS Center for Excellence in Regional Atmospheric Environment, Institute of Urban Environment, Chinese Academy of Sciences, Xiamen 361021, China

*Correspondence to:* hqgui@aiofm.ac.cn (Huaqiao Gui) and ywsun@aiofm.ac.cn (Youwen Sun)

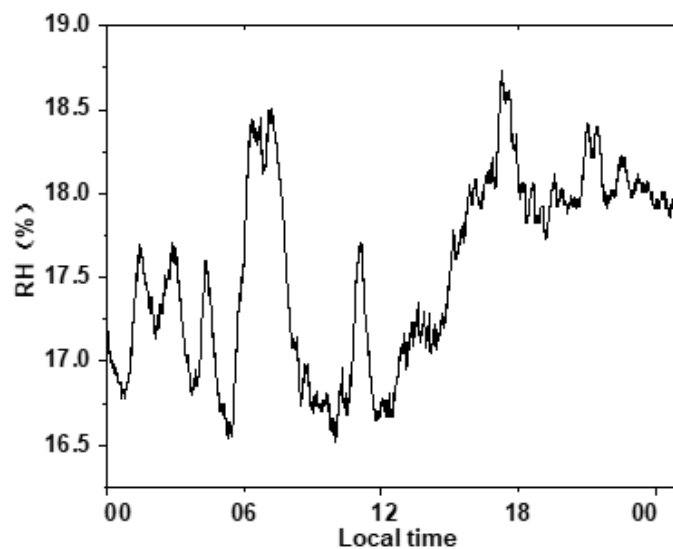

**Figure S1** Time series of RH downstream of DMA

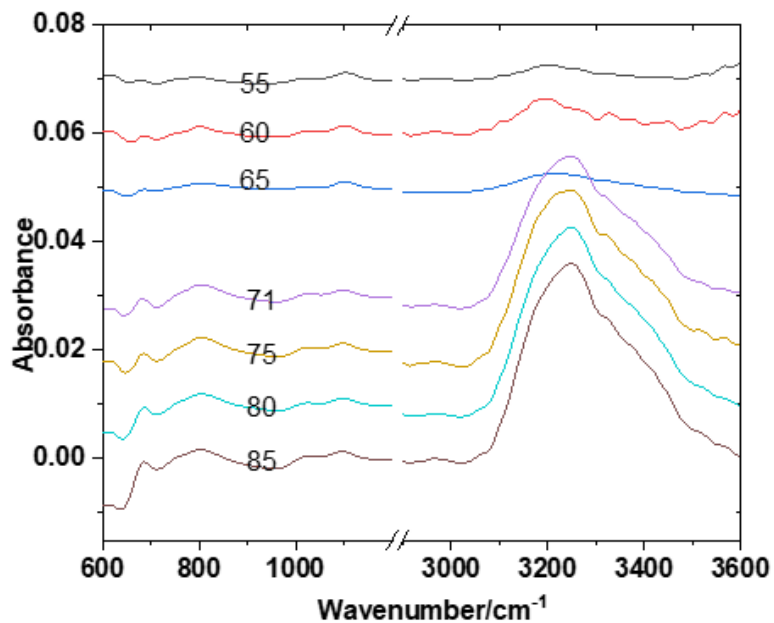

**Figure S2.** FTIR spectral characteristics of the SN nanoparticles under humidity conditions from 55% to 85% (RH).

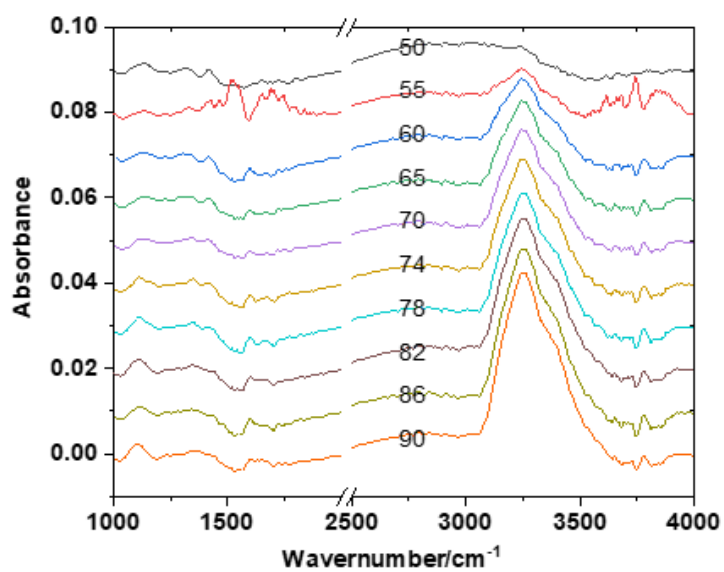

**Figure S3.** FTIR spectral characteristics of the AS/SN nanoparticles under humidity conditions from 50% to 90% (RH).

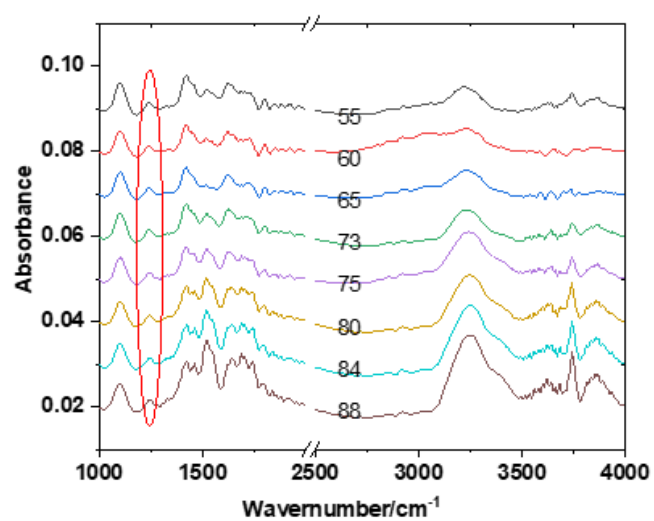

**Figure S4.** FTIR spectral characteristics of the AS/OA nanoparticles under humidity conditions from 55% to 88% (RH).
