# Supplementary material for: Technical Note: Real-Time Diagnosis of the Hygroscopic Growth Micro-Dynamics of Nanoparticles with Two-Dimensional Correlation Infrared Spectroscopy
Source: Copernicus journal article supplement (doi:10.5194/acp-2021-763), 2021-11-15
Supplement: Supplementary file 2 [file acp-2021-763-supplement.pdf]

*Supplement of*

# **Real-Time Diagnosis of the Hygroscopic Growth Micro-Dynamics of Nanoparticles with Two-Dimensional Correlation Infrared Spectroscopy**

Xiuli Wei<sup>1,2</sup>, Haosheng Dai<sup>1,2</sup>, Huaqiao Gui<sup>1,3</sup>, Jiaoshi Zhang<sup>1</sup>, Yin Cheng<sup>1,2</sup>, Jie Wang<sup>1</sup>, Yixin Yang<sup>1</sup>, Youwen Sun<sup>1</sup>, and Jianguo Liu<sup>1,2,3</sup>

1 Key Laboratory of Environmental Optics and Technology, Anhui Institute of Optics and Fine Mechanics, Hefei Institutes of Physical Science, Chinese Academy of Sciences, Hefei 230031, China

2 University of Science and Technology of China, Hefei 230031, China

3 CAS Center for Excellence in Regional Atmospheric Environment, Institute of Urban Environment, Chinese Academy of Sciences, Xiamen 361021, China

*Correspondence to:* hqgui@aiofm.ac.cn (Huaqiao Gui) and ywsun@aiofm.ac.cn (Youwen Sun)

Figure S1 shows the comparison of predicted  $M_{water}/M_0$  and measured hygroscopic properties of AS nanoparticles

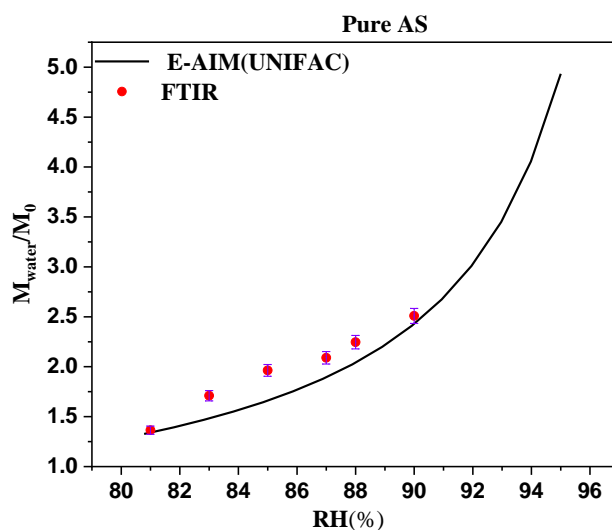

**Figure S1.** Comparison of predicted  $M_{water}/M_0$  and measured hygroscopic properties of AS nanoparticles from FTIR spectra with a dry diameter of 100 nm during the humidification process as a function of RH. The black curve shows the E-AIM (UNIFAC) prediction.
